# Supplementary material for: Structure-dependent mechanochromism of two Ag(i) imidazolate chains
Source: Royal Society of Chemistry journal article supplement (doi:10.1039/c5ce01852h), 2015-11-23
Supplement: c5ce01852h1.pdf [file c5ce01852h1.pdf]

## Supporting Information

### 5 **Structure-dependent Mechanochromism of two Ag(I) Imidazolate Chains**

Liyang Liu<sup>a,b</sup>, Tian Wen<sup>b\*</sup>, Wen-Qiang Fu<sup>a,b</sup>, Min Liu<sup>a,b</sup>, Shumei Chen<sup>a,b\*</sup>, Jian Zhang<sup>b</sup>

10 <sup>a</sup> *College of Chemistry, Fuzhou University, Fuzhou, Fujian 350108, China. E-mail: [csm@fzu.edu.cn](mailto:csm@fzu.edu.cn)*

<sup>b</sup> *State Key Laboratory of Structural Chemistry, Fujian Institute of Research on the Structure of Matter, the Chinese Academy of Sciences, Fuzhou, Fujian 350002, China. E-mail: [twen@fjirsm.ac.cn](mailto:twen@fjirsm.ac.cn)*

15

20

25

30

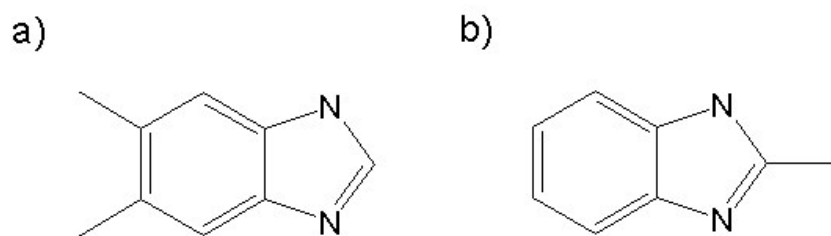

**Figure S1** (a) The imidazole –based ligands for the construction of compound 1 (a) and 2 (b).

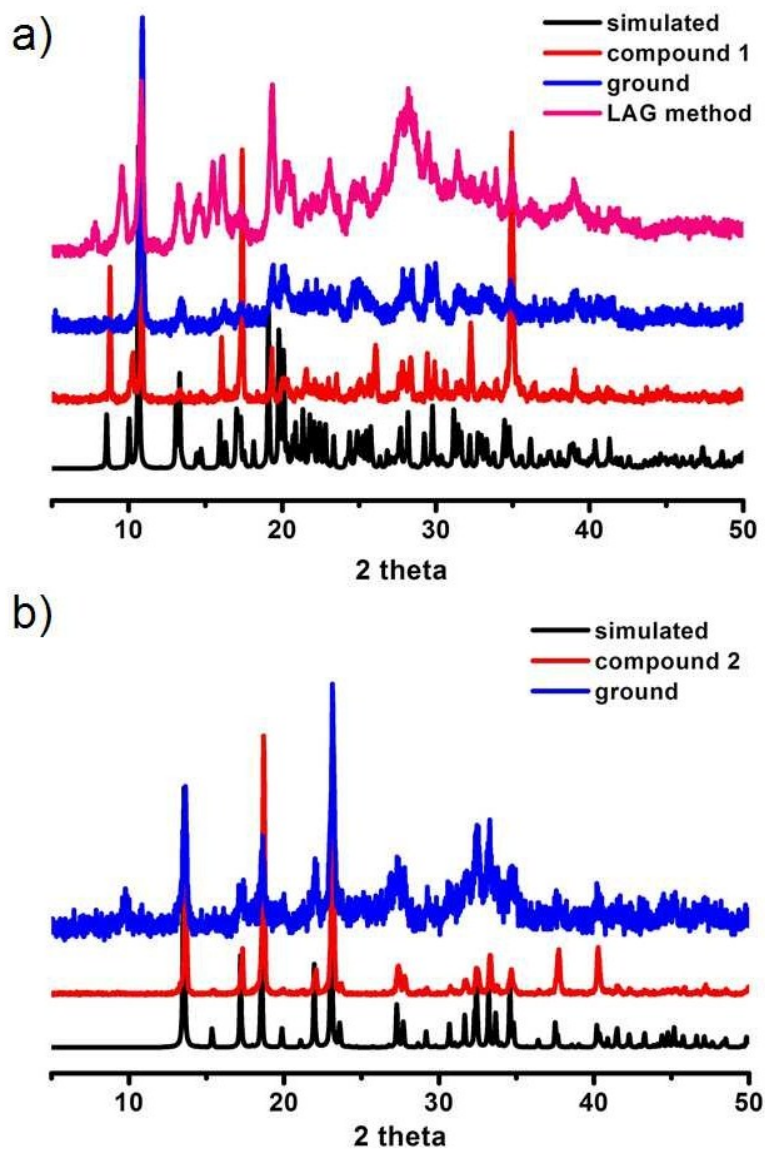

**Figure S2** The PXRD patterns of 1 (a) and 2 (b) under different conditions.

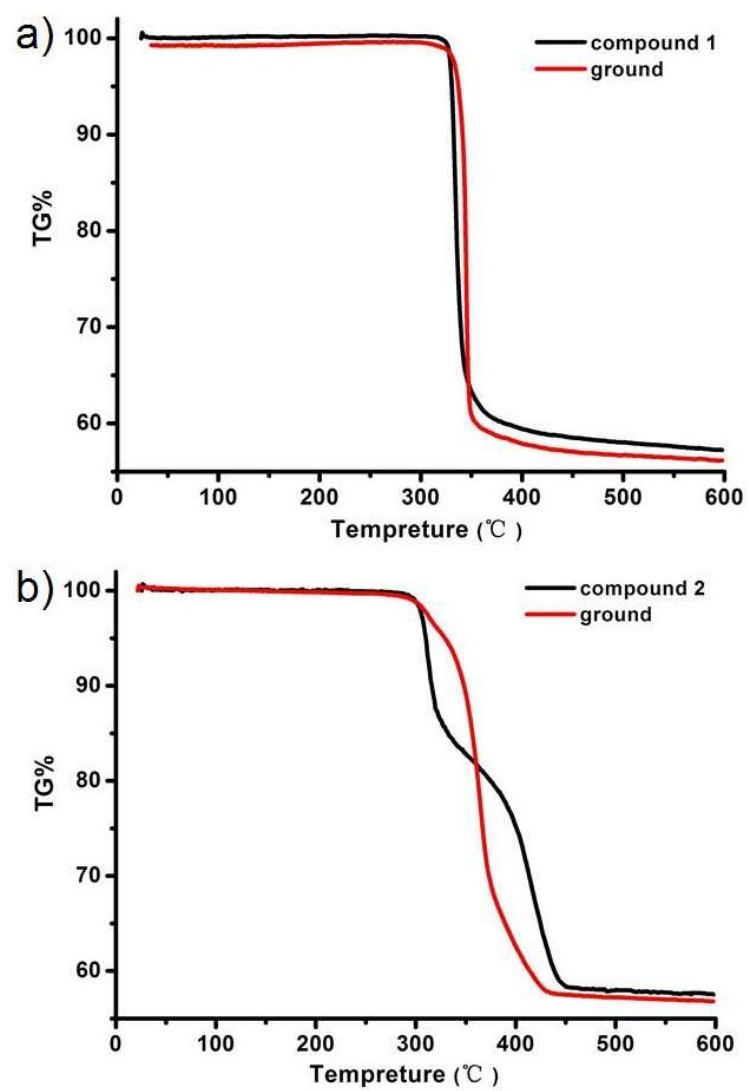

**Figure S3** Thermogravimetric analyses of **1** (a) and **2** (b).

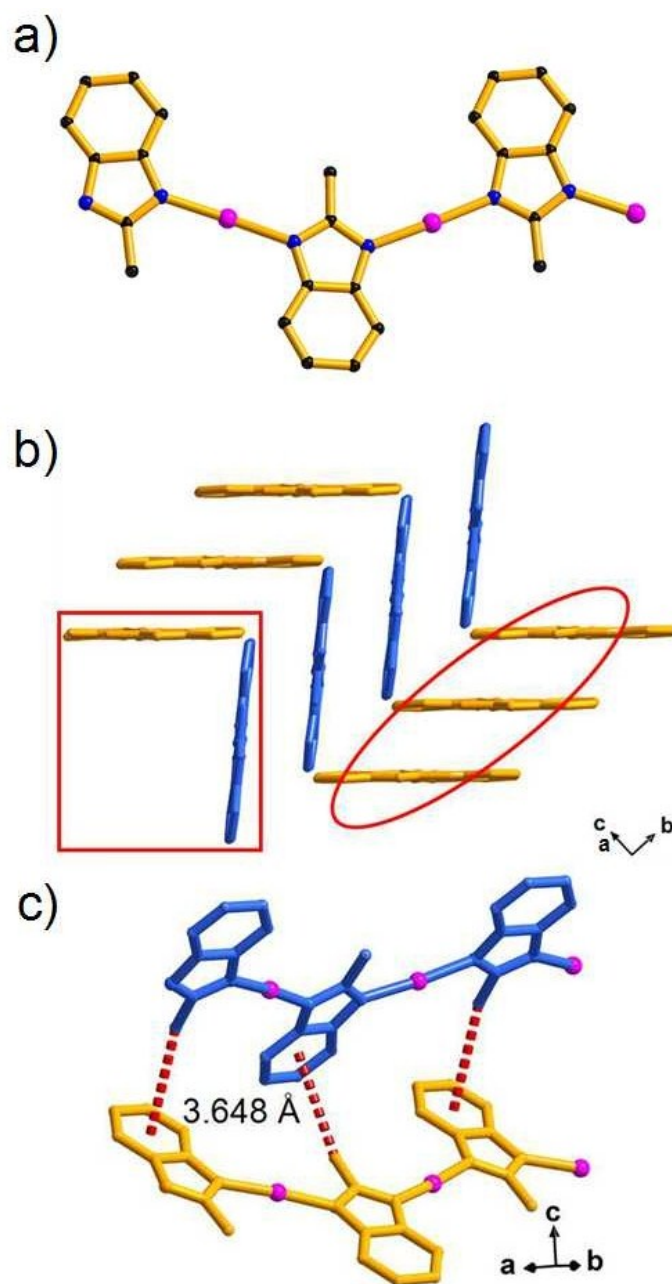

**Figure S4** (a) The coordination environment in **2**, showing zigzag chain; (b) Chain to chain packing form along the *c* axis in **2**; (c) Edge-to-face packing form showing C- $\pi$  interaction (red dashed line) in **2**.

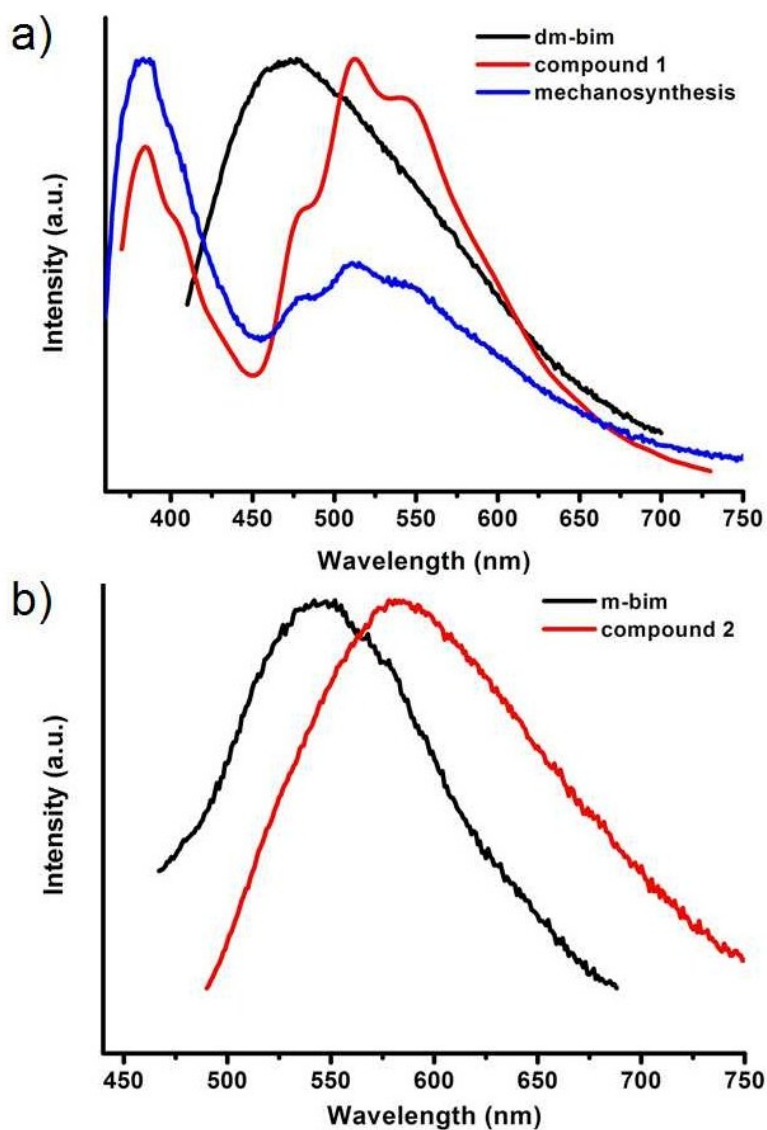

**Figure S5** The solid-state photoluminescent spectrum of **1** (a), **2** (b) and ligand at room temperature.

| T (K)         | $\tau_1$ (s)<br>(%)  | $\tau_2$ (s)<br>(%) | $\tau_3$ (s)<br>(%) |
|---------------|----------------------|---------------------|---------------------|
| 77(Unground)  | 6.146E-11<br>(7.76)  | 2.809E-9<br>(44.39) | 7.565E-9<br>(47.86) |
| 298(Unground) | 4.925E-11<br>(10.31) | 2.006E-9<br>(37.78) | 6.322E-9<br>(51.91) |
| 298(Ground)   | 3.457E-10<br>(12.82) | 2.696E-9<br>(50.97) | 8.686E-9<br>(36.21) |

**Table S1** The solid-state photoluminescent Lifetimes ( $\tau$ ) of **1** under different conditions.
